# Supplementary material
Source: Springer Nature journal article supplement (https://www.springermedizin.de/resource/supplementary/12943_2007_291_MOESM1_ESM.pdf/9553872)

**A**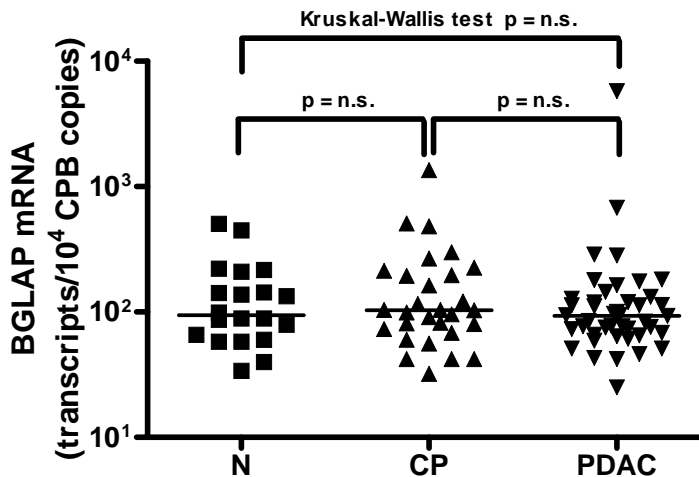**B**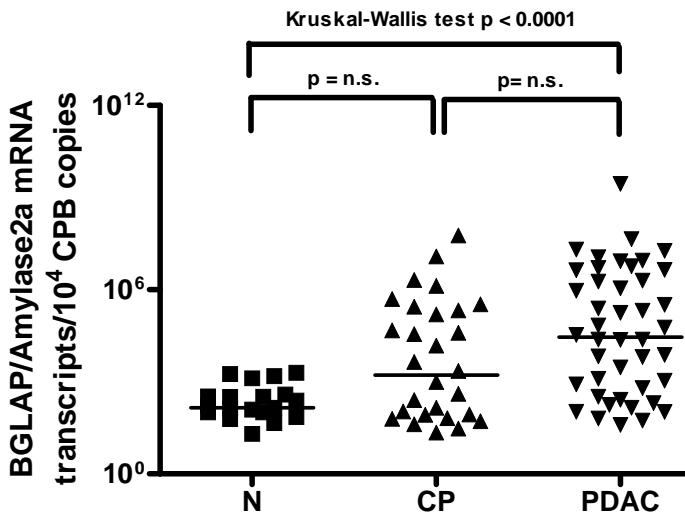

Supplement: MOESM1 [file 9553872]
